# Supplementary material for: The NMR restraints grid at BMRB for 5,266 protein and nucleic acid PDB entries
Source: PubMed Central journal article supplement — J Biomol NMR. 2009 Oct 7;45(4):389–96. doi: 10.1007/s10858-009-9378-z (PMC2777234; doi:10.1007/s10858-009-9378-z), 2009-10-07
Supplement: 10858_2009_9378_MOESM1_ESM.pdf [file 10858_2009_9378_MOESM1_ESM.pdf]

Title: The NMR Restraints Grid (NRG) at BMRB for 5,266 protein and nucleic acid PDB entries

Authors: Jurgen F. Doreleijers, Wim F. Vranken, Christopher Schulte, Jundong Lin, Jonathan R. Wedell, Christopher J. Penkett, Geerten W. Vuister, Gert Vriend, John L. Markley, and Eldon L. Ulrich

Below is a list of 4,014 PDB entries that constitute the set of 'Good' entries.

149d 170d 171d 17ra 1a1p 1a1t 1a24 1a3p 1a4d 1a51 1a57 1a5e 1a5j 1a60 1a6x 1a7f 1a7i 1a7m 1a93 1a9l 1aa3 1aa9 1ab7 1abz 1ac0  
1acz 1adx 1adz 1af8 1afi 1afj 1afo 1afp 1aft 1ag7 1agg 1agt 1ah9 1ahk 1ahl 1aj1 1aj4 1ajl 1ajt 1ajw 1ak6 1ak7 1ak8 1akk 1al5 1ale 1alf  
1alg 1amb 1anr 1ao1 1ao8 1aoo 1aot 1aou 1ap4 1ap8 1apf 1apq 1aq5 1aqa 1aqq 1aqr 1aqs 1arj 1as5 1ato 1atv 1atw 1au5 1au6 1auz 1av3  
1aw6 1aww 1awx 1awy 1ax6 1ax7 1axh 1axl 1axo 1axu 1axv 1ayj 1ayk 1azk 1b03 1b1v 1b22 1b2i 1b3c 1b4c 1b4r 1b4y 1b5n 1b64 1b6x  
1b6y 1b75 1b9p 1b9q 1b9r 1b9u 1ba4 1ba5 1ba6 1bah 1bal 1bau 1bbg 1bbl 1bbn 1bbo 1bc4 1bc6 1bcb 1bce 1bci 1bcn 1bd6 1be5 1beg  
1bf0 1bf8 1bf9 1bfj 1bgk 1bgz 1bh1 1bh4 1bhj 1bhr 1bhu 1biv 1bj2 1bjb 1bjc 1bjh 1bk8 1bku 1bla 1blj 1blq 1blr 1bm4 1bm5  
1bm6 1bmr 1bmx 1bnb 1bno 1bqx 1bqz 1brv 1brz 1bsh 1bu9 1bve 1bvm 1bwe 1bwt 1bwX 1bxd 1byp 1by0 1bym 1byx 1bz2  
1bz3 1bzf 1bzg 1bzK 1bzt 1bzu 1c05 1c06 1c2n 1c2u 1c49 1c4e 1c6s 1c7v 1c7w 1c98 1c9a 1cb3 1cb9 1ce3 1cej 1cey 1cfa 1cfc 1cfe 1cfl  
1chl 1chv 1cir 1cig 1ck2 1ckk 1ckr 1ckv 1ckw 1ckx 1cky 1ckz 1cl4 1cld 1cmf 1cmg 1cmr 1cmz 1cn2 1cn7 1cnl 1cnn 1coc 1coK 1cou  
1cq0 1cqq 1crr 1cw5 1cw6 1cwX 1cx1 1cz4 1cz5 1d0t 1d1d 1d1h 1d1n 1d1r 1d2b 1d2j 1d2l 1d3z 1d5g 1d5v 1d6b 1d6x 1d8v 1d8z  
1d9a 1d9j 1d9l 1d9m 1d9o 1d9p 1d9s 1daq 1dav 1dax 1dby 1dec 1dc7 1dcj 1dcz 1dd2 1de3 1dec 1dep 1df6 1dfd 1dft 1dg2 1dgo 1dgg  
1dip 1djd 1djf 1djm 1dkc 1dl0 1dl4 1dmd 1dmf 1dmo 1dn3 1dng 1do9 1doq 1dp3 1dqB 1ds9 1dsk 1dsm 1dsq 1dsv 1du1 1du2 1du9 1duf  
1dum 1dv5 1dvv 1dvw 1dw4 1dw5 1dx7 1dx8 1dxa 1dxn 1e0g 1e0h 1e0q 1e0z 1e10 1e17 1e3y 1e41 1e4p 1e4u 1e52 1e5b 1e5c 1e74  
1e75 1e76 1e7j 1e88 1e8b 1e8l 1e8p 1e8q 1e8r 1e95 1e9k 1e9t 1eci 1ed7 1edp 1ef5 1efe 1egs 1egX 1eh2 1eht 1eig 1eih 1eit 1eiv  
1ejp 1el2 1eln 1emn 1eol 1eot 1eph 1epj 1eq0 1eq3 1eqx 1ery 1esh 1esk 1etf 1ev0 1ewl 1eww 1exe 1eyo 1eza 1ezo 1ezp 1ezt 1ezy 1f03  
1f04 1f0z 1f2g 1f2h 1f3y 1f43 1f53 1f5g 1f5h 1f5u 1f5y 1f6x 1f6z 1f78 1f79 1f7e 1f7f 1f7g 1f7h 1f7i 1f7m 1f84 1f85 1f8h 1f8p 1f8z  
1f95 1f96 1f9l 1fa4 1fad 1faf 1fc8 1fcl 1fd6 1fex 1fl1 1ff7 1ffj 1ffm 1fgp 1fh3 1f5 1f6 1fd 1fjk 1fjn 1fjp 1fk1 1fls 1fm1 1fms 1fmh  
1fmm 1fnn 1fnx 1fow 1fpw 1fqg 1fr0 1fsd 1ftt 1fu9 1ful 1fuv 1fuw 1fv5 1fv8 1fvn 1fwo 1fwp 1fyc 1fyj 1fzt 1fzx 1g03 1g10 1g11 1g14  
1g1e 1g1p 1g1z 1g22 1g25 1g26 1g2g 1g2s 1g2t 1g3a 1g47 1g4f 1g6e 1g6j 1g6m 1g7z 1g80 1g89 1g8c 1g91 1g92 1g9e 1g9l 1g9p 1ga3  
1gb1 1gb4 1gbr 1gcc 1gd3 1gd4 1gd5 1gdf 1ge9 1gea 1ggw 1gh1 1gh5 1gh8 1gh9 1ghh 1ghj 1ghk 1ght 1ghu 1gib 1gjs 1gjt 1gix 1gjz  
1gxn 1gpo 1gpx 1guc 1gw3 1gw4 1gxx 1gyz 1h0t 1h0z 1h2o 1h3z 1h4b 1h7d 1h7j 1h95 1ha6 1ha8 1hbw 1hd6 1hdj 1hdl 1heh 1hej  
1hfg 1hi7 1hiq 1his 1hit 1hlx 1hml 1hns 1ho0 1ho2 1ho6 1ho7 1ho9 1hof 1hoq 1hov 1hp2 1hp3 1hp8 1hp9 1hpk 1hpw 1hpy 1hqB 1hqi  
1hrl 1hrl 1hry 1hs5 1hs7 1hsn 1ht4 1ht7 1hth 1hu5 1hu7 1hue 1hum 1hvw 1hwq 1hww 1hx2 1hx4 1hx7 1hy8 1hz8 1hze 1hzk 1hzi 1i0u  
1i11 1i25 1i2u 1i2v 1i3x 1i42 1i46 1i4b 1i5j 1i5t 1i5u 1i6c 1i6f 1i6g 1i6y 1i7v 1i8e 1i8g 1i8x 1i8y 1i93 1i9k 1ib7 1ib9 1iba 1ibi 1ie9  
1ieh 1iel 1ico 1icy 1id6 1id7 1idg 1idh 1idi 1idl 1idy 1ie6 1ien 1ieo 1iez 1ifw 1ig6 1igl 1ih0 1ihq 1ihv 1iio 1ijz 1ik0 1ikm 1il6 1im1 1im7  
1imq 1imu 1ioj 1iox 1ip0 1ip9 1ipp 1iqo 1iqs 1ir5 1irh 1iry 1irz 1isk 1itf 1itl 1ity 1iv6 1iva 1ivm 1iw4 1iwc 1iwf 1ix5 1iy5 1iyc 1iyg  
1iym 1iyu 1iyy 1j03 1j0q 1j0t 1j2o 1j3d 1j3s 1j3x 1j4y 1j5h 1j5j 1j5l 1j5m 1j5n 1j6q 1j6t 1j6y 1j7m 1j7o 1j7p 1j8c 1j8i 1j8k 1j9i 1j9o  
1jas 1jba 1jc2 1jcf 1jcu 1jcd 1je3 1je4 1je9 1jff 1jfk 1jfn 1jgk 1jh3 1jhb 1ji8 1ji9 1jjg 1jjr 1jjz 1jkn 1jkk 1jli 1jlo 1jlp 1jlz 1jmn 1jmp 1jn7  
1jnj 1jns 1jnt 1jo5 1jo6 1jo7 1jok 1joo 1joq 1jor 1jox 1jpo 1jqr 1jrb 1jrr 1jrm 1jrt 1jtw 1ju5 1ju7 1ju8 1jur 1jv8 1jv9 1jw2 1jw3 1jwe  
1jy4 1jyt 1jzc 1jzp 1jzu 1k19 1k1c 1k1v 1k1z 1k2g 1k2h 1k2m 1k3g 1k3h 1k3j 1k3m 1k3n 1k3q 1k42 1k43 1k45 1k5o 1k5w 1k64 1k81  
1k8b 1k8h 1k8v 1k91 1k9c 1k9q 1k9r 1ka6 1kaj 1kal 1kb7 1kbs 1kca 1kgm 1khh 1kik 1kio 1kis 1kj0 1kjs 1kka 1kko 1kkk 1kkv 1klc  
1klq 1klr 1kls 1kma 1knd 1kn7 1kot 1koy 1koz 1kpd 1kq8 1kqh 1kqi 1kqv 1kr8 1krw 1ksm 1ktm 1kul 1kvs 1kw4 1kvg 1kvi 1kvz 1kwd  
1kwe 1kx6 1kz0 1kz2 1kz5 1kzs 1kzt 1kzv 1l1i 1l1k 1l1p 1l1w 1l2m 1l2y 1l2z 1l3e 1l3g 1l3h 1l3x 1l3y 1l4w 1l5i 1l7y 1l8c 1l4a 1l48  
1l4e 1l4i 1l4q 1l4s 1l5b 1l5d 1l5z 1l6v 1l6w 1l7a 1l7f 1l7y 1l8p 1l8t 1m0g 1m12 1m23 1m2c 1m2e 1m2f 1m30 1m39 1m3a 1m3b  
1m3c 1m4e 1m4f 1m4p 1m5z 1m60 1m6a 1m7t 1m82 1m8l 1m8m 1m94 1m9g 1m9o 1ma4 1ma5 1ma6 1maj 1mak 1mb6 1mbk 1mdi  
1mf1 1mf5 1mg8 1mhi 1mhj 1mii 1mjd 1mk3 1mke 1mm4 1mm5 1mmc 1mnl 1mot 1mp1 1mpe 1mpz 1mq1 1msf 1mtq 1mut 1muv  
1mv2 1mv4 1mvi 1mvl 1mw4 1mxi 1mxn 1mxp 1mxq 1myo 1myu 1mzk 1n0a 1n0z 1n1u 1n2y 1n3g 1n4b 1n4c 1n4i 1n4n 1n53  
1n66 1n6t 1n6u 1n6v 1n6z 1n7t 1n88 1n89 1n8m 1n8x 1n91 1n9c 1na2 1naj 1nau 1nbl 1nbj 1nbl 1nbn 1ncs 1nct 1nd9 1ne3 1ne5 1ner  
1nev 1nfa 1ng7 1nh5 1ni7 1nil 1nin 1nix 1niy 1niz 1nj0 1nj3 1nk2 1nkf 1nku 1nmr 1nmv 1nmw 1nnv 1no8 1noq 1nor 1np5 1npq 1nr3  
1nrB 1nso 1ntc 1nti 1ntf 1nvo 1nwb 1nxi 1ny4 1ny8 1ny9 1nya 1nyd 1nyn 1nyo 1nyp 1nzz 1o6x 1o78 1o7b 1o7c 1o8r 1o8t 1oca 1oed  
1oep 1odp 1odq 1odr 1oeg 1oeg 1oka 1olg 1omq 1onb 1ont 1o9o 1op1 1opp 1opq 1opz 1oq3 1oq6 1oqa 1oqp 1or5 1orx 1ov2 1ovq  
1ovx 1ow5 1owa 1oyi 1ozi 1ozs 1p0g 1p0j 1p0l 1p0o 1p1d 1p1e 1p1p 1p1t 1p23 1p4q 1p5k 1p5l 1p5m 1p5n 1p5o 1p5p 1p68 1p6r 1p6s  
1p6t 1p7a 1p7e 1p7f 1p7m 1p88 1p89 1p8a 1p9f 1p9j 1p9k 1p9z 1pa4 1pan 1pb5 1pbu 1pc0 1pc2 1pd7 1pe3 1peh 1pei 1pfj 1pfl 1pfm  
1pg9 1pgc 1pib 1pjj 1pjj 1pjj 1plo 1plv 1plx 1pme 1pms 1pn5 1pon 1poz 1pp5 1ppq 1ppx 1pqn 1pqx 1prv 1ps2 1psm 1psy 1pu3 1pun  
1puq 1pus 1pux 1puz 1pv0 1pxe 1pxq 1pyc 1q0v 1q10 1q1v 1q27 1q2j 1q2k 1q2n 1q38 1q3y 1q3z 1q48 1q56 1q59 1q60 1q6a 1q6b  
1q71 1q7i 1q7j 1q80 1q8g 1q8l 1q9p 1qbf 1qdp 1qes 1qet 1qfa 1qfd 1qgl 1qhk 1qjk 1qjl 1qjt 1qk6 1qk7 1qkf 1qkg 1qkh 1qkl 1qly 1qmc  
1qmq 1qnd 1qnk 1qpu 1qqi 1qqv 1qsk 1qu5 1quz 1qvp 1qwa 1qwb 1qvw 1qx9 1qxb 1qxc 1qxf 1qxq 1qyt 1qze 1qzp 1r02 1r05 1r1f 1r2a  
1r2p 1r2u 1r36 1r4h 1r4k 1r4t 1r57 1r63 1r6h 1r6p 1r6r 1r73 1r7c 1r7d 1r7e 1r7f 1r7g 1r8t 1r8u 1r8p 1r9b 1r9k 1rg3 1rg4  
1rgw 1rh8 1rhw 1rhx 1ri0 1ri9 1rij 1rik 1rim 1rja 1rji 1rjj 1rjv 1rkk 1rkl 1rkn 1rl1 1rl5 1rlp 1rml 1rnl 1ron 1roo 1rot 1rpr 1rpv 1rq6 1rq8  
1rqm 1rqt 1rqu 1rvq 1rr 1rsf 1rso 1rtn 1ruu 1rvs 1rw2 1rw5 1rws 1rww 1rxl 1ry3 1ry4 1ryg 1ryj 1ryk 1ryv 1rzs 1rzw 1s04 1s1n 1s24  
1s2h 1s34 1s37 1s3a 1s4h 1s4j 1s5r 1s6d 1s6o 1s6u 1s6w 1s6x 1s7e 1s7j 1s8k 1s9l 1s9s 1saf 1sb0 1sb6 1sbj 1scv 1sdf 1sf0 1sg7 1sgo  
1shi 1sj6 1sjj 1sjr 1skh 1skt 1slj 1slo 1sm7 1smg 1smz 1sn6 1snb 1snj 1snl 1so9 1soh 1sop 1sou 1soy 1sp1 1sp2 1sp7 1spk 1spy 1sq8  
1sqr 1sr3 1srB 1srk 1srz 1ssl 1ss2 1ss3 1ss7 1sse 1ssf 1ssl 1sso 1ssu 1ssv 1suy 1sv1 1svj 1sw8 1sx0 1sx1 1sxd 1sxe 1sxm 1sy4 1sy9  
1sym 1szb 1szl 1szv 1szy 1t0g 1t0v 1t0w 1t0y 1t17 1t1h 1t1t 1t2m 1t2y 1t3k 1t3o 1t4l 1t4x 1t4y 1t4z 1t51 1t52 1t54 1t55 1t5q 1t6w 1tac  
1tbc 1tbd 1tbk 1teg 1tch 1tdp 1te4 1te7 1tfb 1tfs 1th5 1ti3 1tih 1tin 1tit 1tiz 1tk7 1tkn 1tl5 1tle 1tm6 1tm9 1tmn 1tnp 1tnr 1tnw  
1toz 1tp4 1tq1 1tqr 1tqz 1tr4 1tr6 1tt3 1ttt 1tte 1ttl 1ttt 1ttx 1tum 1tuz 1tv0 1tvc 1tvi 1tvj 1tvm 1txa 1txp 1txs 1u0p 1u2a 1u2f 1u2u 1u34  
1u37 1u38 1u39 1u3k 1u3m 1u3o 1u4a 1u57 1u5l 1u5m 1u6f 1u6u 1u6v 1u7q 1u81 1u85 1u86 1uao 1ucv 1udk 1udl 1udm 1ue9 1ufm  
1ufn 1ufw 1ufx 1ufz 1ug0 1ugj 1ugk 1ugl 1ugo 1uhc 1uhf 1uhp 1uht 1uhu 1uhz 1uil 1uit 1ujd 1ujl 1ujo 1ujr 1ujs 1ujt 1uju 1ujx 1ujy 1ul4  
1ul5 1ul7 1ull 1ulo 1um7 1umg 1umt 1uqv 1uts 1uuu 1uw0 1uxc 1uxa 1uyb 1uzc 1v1c 1v1d 1v27 1v28 1v38 1v3a 1v46 1v49 1v4q 1v4z  
1v56 1v5j 1v5k 1v5l 1v5q 1v5s 1v63 1v6f 1v6r 1v80 1v81 1v85 1v86 1v9j 1v9v 1v9w 1v9x 1val 1va2 1va3 1va8 1vaz 1vb8 1vcs 1vd4  
1vdl 1veg 1veh 1vej 1vek 1vf9 1vfi 1vg5 1vib 1vii 1vj6 1vkr 1vkt 1vm2 1vm3 1vm4 1vm5 1vme 1vnd 1vpu 1vrc 1vrv 1vtp 1vtx 1vyx  
1vzs 1w09 1w0a 1w0b 1w1n 1w2q 1w3d 1w4e 1w4f 1w4g 1w4h 1w4i 1w4j 1w4k 1w6v 1w7d 1w7e 1wa8 1wbr 1wcl 1wcn 1wcr 1we6  
1we7 1we8 1we9 1wee 1wem 1wen 1weo 1wep 1weq 1wes 1wev 1weW 1wex 1wey 1wf5 1wf6 1wf7 1wf8 1wf9 1wfe 1wff 1wfg 1wfh  
1wfi 1wjj 1wfk 1wfl 1wfm 1wfn 1wfo 1wfp 1wfg 1wfr 1wfs 1wft 1wfu 1wfv 1wfw 1wgl 1wg4 1wgu 1wgx 1wgy 1wh1 1wh3 1wi4  
1wi5 1wi6 1wi8 1wi9 1wia 1wib 1wid 1wif 1wig 1wih 1wii 1wiv 1wj0 1wj1 1wj2 1wj6 1wj7 1wjd 1wje 1wjj 1wjK 1wjL 1wjM 1wjN  
1wjo 1wjp 1wjz 1wjr 1wjs 1wki 1wks 1wkt 1wmj 1wmv 1wmw 1wo3 1wo4 1wo5 1wo6 1wo7 1wo9 1wot 1wqb 1wqB 1wr3 1wr4 1wr7  
1wrf 1wrg 1wt7 1wt8 1wuz 1wvk 1wvo 1wvn 1wvu 1wvv 1wvx 1wvy 1wxl 1wxn 1wxp 1wxv 1wyh 1wyj 1wyl 1wym 1wyn 1wyo  
1wyp 1wyz 1wyr 1wys 1wz5 1x0n 1x22 1x2o 1x2s 1x2u 1x2v 1x2x 1x2y 1x2z 1x30 1x32 1x37 1x43 1x44 1x45 1x47 1x48 1x49 1x4a  
1x4b 1x4c 1x4d 1x4e 1x4f 1x4g 1x4h 1x4i 1x4j 1x4k 1x4l 1x4m 1x4n 1x4o 1x4p 1x4q 1x4r 1x4s 1x4t 1x4u 1x4v 1x4w 1x4x 1x4y 1x4z  
1x50 1x51 1x53 1x5a 1x5b 1x5c 1x5d 1x5e 1x5f 1x5g 1x5h 1x5i 1x5j 1x5k 1x5l 1x5n 1x5o 1x5p 1x5q 1x5r 1x5v 1x60 1x61 1x62 1x63  
1x64 1x65 1x66 1x67 1x69 1x6b 1x6c 1x6d 1x6e 1x6f 1x6g 1x6h 1x9b 1x9l 1x9v 1xbd 1xc0 1xc5 1xce 1xdx 1xf7 1xfe 1xfl 1xfr 1xga  
1xgb 1xgc 1xgl 1xhh 1xhj 1xhp 1xhs 1xjl 1xjh 1xjs 1xm0 1xmw 1xn5 1xn6 1xn7 1xn8 1xn9 1xna 1xne 1xnt 1xoo 1xop 1xoy 1xpa 1xpn
